# Supplementary material
Source: MDPI journal article supplement (https://www.mdpi.com/1996-1073/12/20/3967)
Supplement: s1 [file s1]

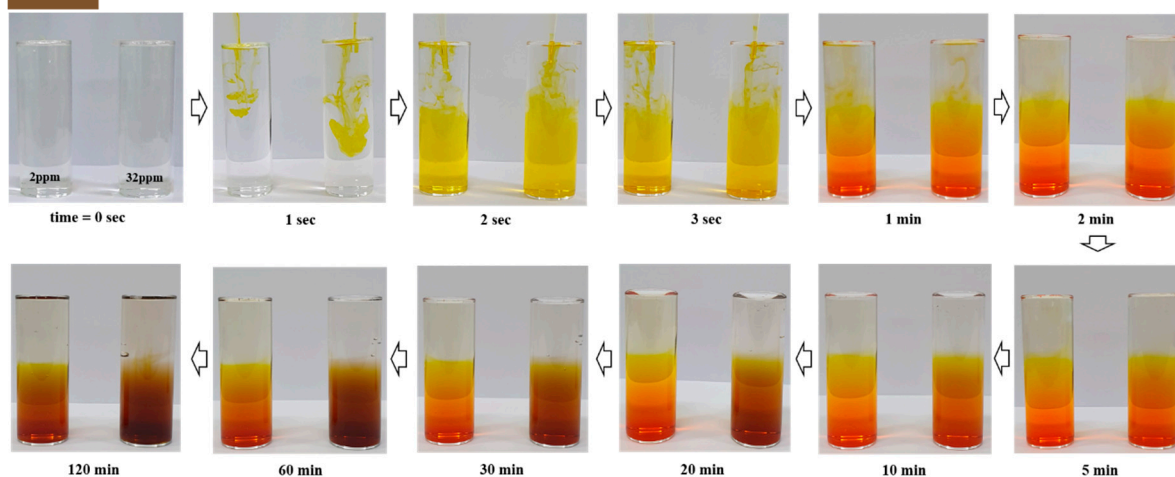

**Figure S1.** Time sequential images of color change in the presence of  $\text{Fe}^{2+}$ . The concentration of hydrazine,  $\text{H}_2\text{O}_2$  and  $\text{Fe}^{2+}$  are 0.025 M, 0.2 M, 2 ppm and 32 ppm, respectively.

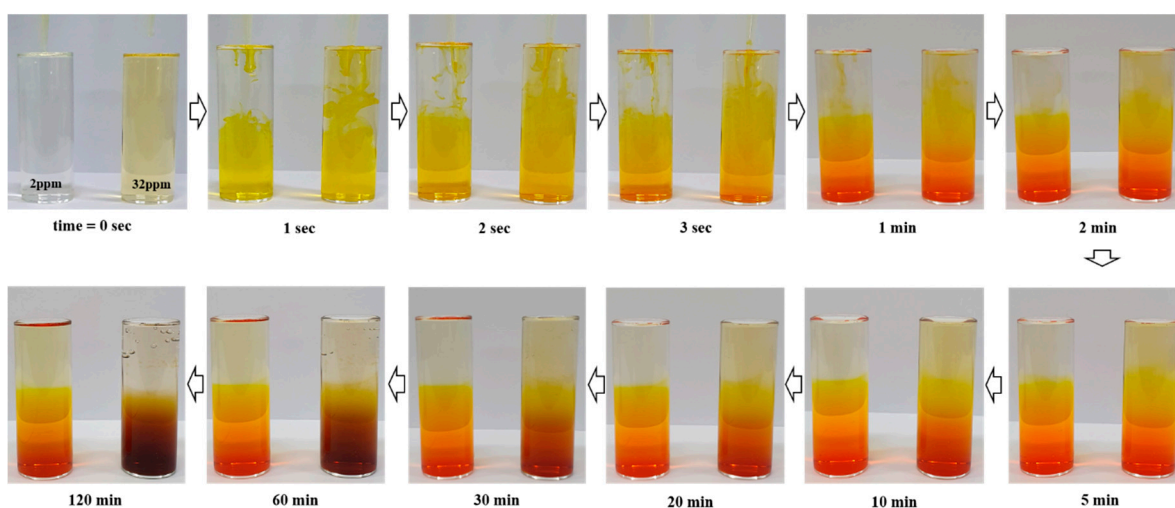

**Figure 2.** Time sequential images of color change in the presence of  $\text{Fe}^{3+}$ . The concentration of hydrazine,  $\text{H}_2\text{O}_2$  and  $\text{Fe}^{3+}$  are 0.025 M, 0.2 M, 2 ppm and 32 ppm, respectively.
